# Supplementary material
Source: publisher figshare collection journal article supplement (https://acs.figshare.com/ndownloader/files/3991861)
Supplement: Supplementary file 1 [file 3991861]

# Influence of Formate Adsorption and Protons on Shallow Trap Infrared Absorption (STIRA) of Anatase TiO<sub>2</sub> During Photocatalysis

David M. Savory and A. James McQuillan\*

## Supplementary Information

### Scanning Electron Microscopy:

Samples were loaded into an SEM cross-sectional holder and coated with approximately 10 nm of gold palladium in an Emitech K575X Peltier-cooled high resolution sputter coater (EM Technologies Ltd, Kent, England). Samples were viewed in a JEOL JSM-6700F field emission scanning electron microscope (JEOL Ltd, Tokyo, Japan) at an accelerating voltage of 5 kV, using the LEI (lower secondary detector) and SEI (upper secondary detector).

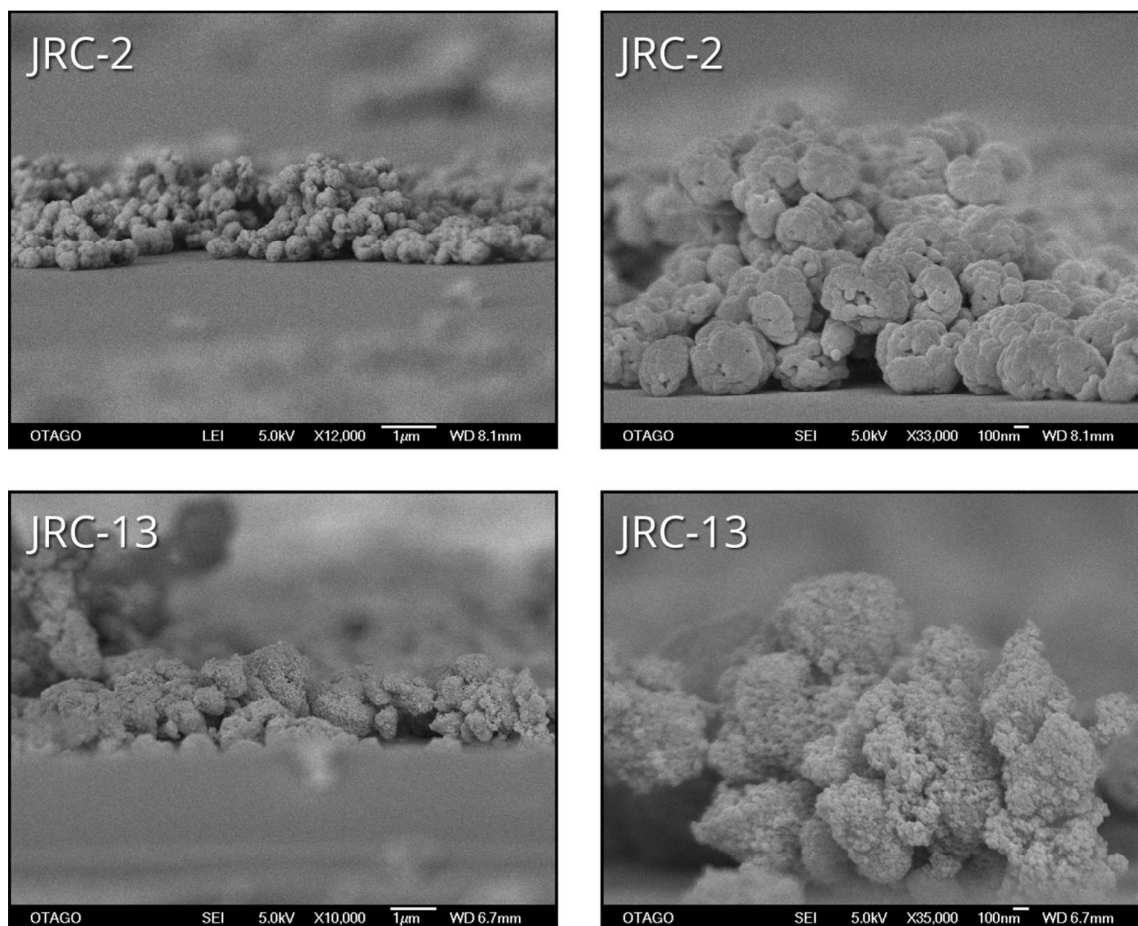

Figure 1: Scanning electron micrograph images of JRC-TiO<sub>2</sub>, 13 films of comparable thickness to those used in ATR-IR experiments.

## Static UV Irradiation Accessory:

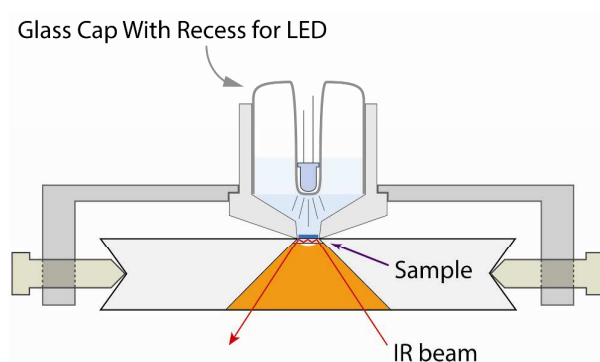

Figure 2: Cell for irradiation of anatase  $\text{TiO}_2$  under oxygen-free static solution conditions. A tapered conical base constructed of Kel-F material isolates the diamond prism surface and houses up to  $\sim 10$  mL of liquid. A glass lid enables sealing of the system, positioning of an LED above the sample, and has small ports allowing for argon sparging of the solution.

## Zeta Potential Measurements:

Zeta potential measurements were performed using a Zetasizer Nano ZS90 (Malvern, UK) instrument with 173° backscatter and MPT-2 autotitrator.  $\text{TiO}_2$  powder was suspended in pH 2.5 HCl giving  $1 \text{ mg mL}^{-1}$   $\text{TiO}_2$  and sonicated for 15 minutes. The suspension was subsequently probed in a folded capillary cell and zeta potential measured following titration with NaOH.

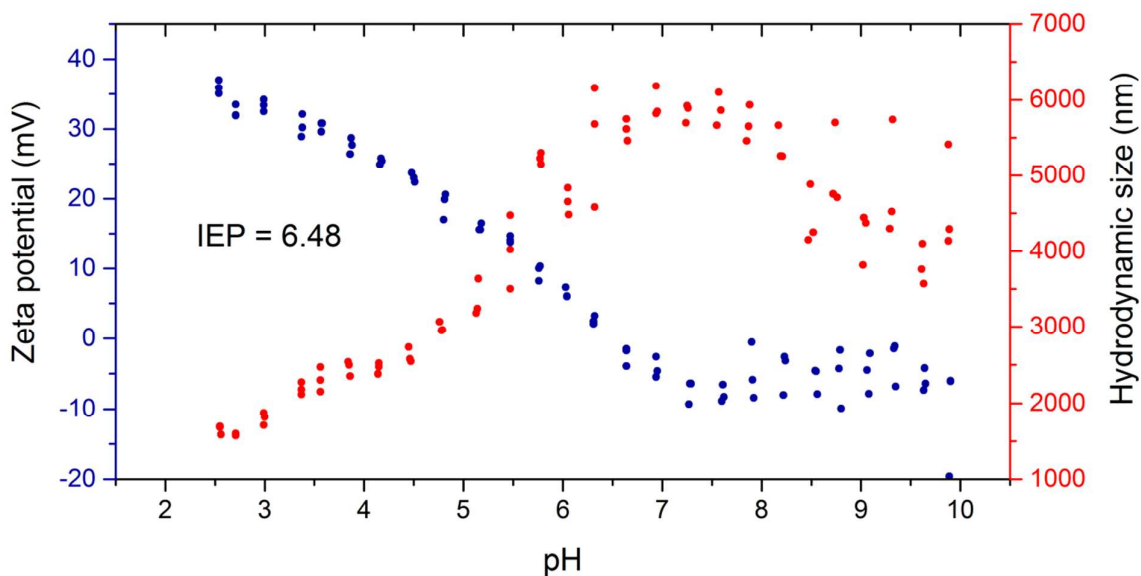

Figure 3: Zeta potential measurements of JRC-TiO-2 showing point of zero charge near pH 6.5.

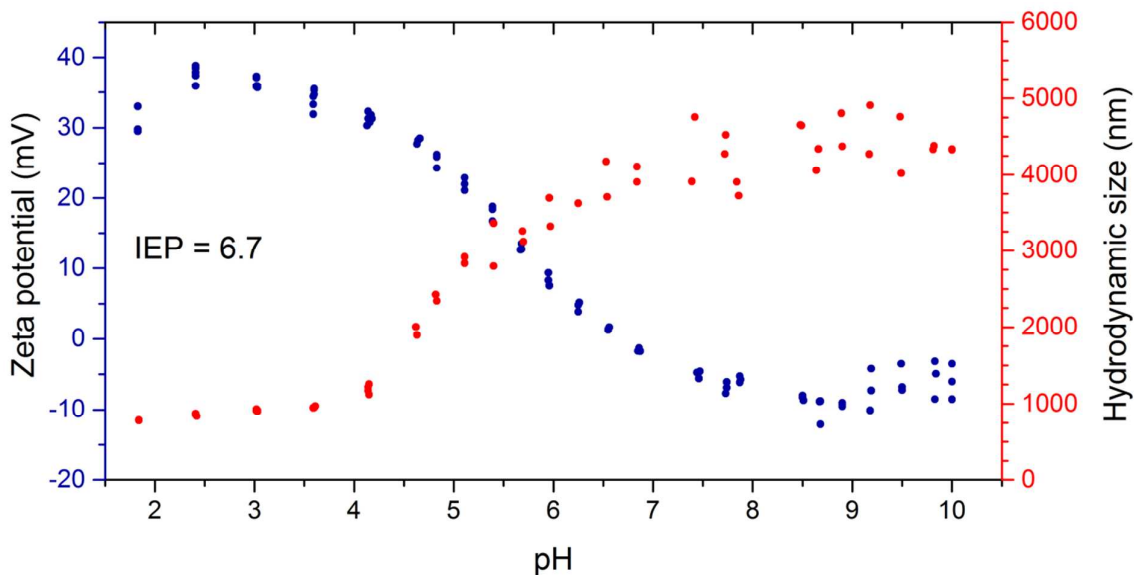

Figure 4: Zeta potential measurements of JRC-TiO-13 showing point of zero charge near pH 6.7.
